# Supplementary material for: Comparative study of the bimolecular electron transfer of fullerenes (C60/C70) and 9,9-disubstituted fluorenes by laser flash photolysis
Source: Royal Society of Chemistry journal article supplement (doi:10.1039/b617814f), 2007-02-15
Supplement: b617814f.pdf [file b617814f.pdf]

Fig. S1. Transient absorption spectra of  $C_{60}$  ( $1 \times 10^{-4}$  mol  $dm^{-3}$ ) in the presence of BAMH ( $4 \times 10^{-4}$  mol  $dm^{-3}$ ) in the benzonitrile.



Fig. S2. Decay rates of  ${}^3C_{60}^*$  at 760 nm with increasing [BAHF] (left) and [BAMF] (right) in BN.



Fig. S3. Plot of  $k_{1st}$  vs.  $[BAMF]$  for  $C_{60}$ /BAMF mixture in benzonitrile.



Fig. S4. Time profiles of  $C_{60}$  ( $1 \times 10^{-4} \text{ mol dm}^{-3}$ ) in the presence of BAMH ( $3 \times 10^{-4} \text{ mol dm}^{-3}$ ) in mixture solvents



Fig. S5. Transient absorption spectra of  $C_{70}$  ( $1 \times 10^{-4} \text{ mol dm}^{-3}$ ) in the presence of BAMF ( $4 \times 10^{-4} \text{ mol dm}^{-3}$ ) in the benzonitrile.



Fig. S6. Transient spectra of C<sub>70</sub> ( $1 \times 10^{-4}$  mol dm<sup>-3</sup>) in the presence of BAFF ( $4 \times 10^{-4}$  mol dm<sup>-3</sup>) in BN. Ex = 532 nm



Fig. S7. Transient spectra of C<sub>70</sub> ( $1 \times 10^{-4}$  mol dm<sup>-3</sup>) / BAHF ( $3 \times 10^{-4}$  mol dm<sup>-3</sup>) / OV<sup>2+</sup> in benzonitrile.
